# Supplementary material for: The highly selective conversion of lignin models and organosolv lignin to amines over a Ru/C catalyst
Source: Royal Society of Chemistry journal article supplement (doi:10.1039/d3su00250k), 2023-01-01
Supplement: d3su00250k1.pdf [file d3su00250k1.pdf]

## Supporting Information

### **The highly selective conversion of lignin models and organosolv lignin to amines over Ru/C catalyst**

Jin Xie,<sup>1</sup> Xiaojing Wu,<sup>1</sup> Jieyun Zhang,<sup>1</sup> Xin Dai,<sup>1</sup> Zelong Li,<sup>\*1</sup> and Can Li<sup>\*1,2</sup>

<sup>1</sup> Key Laboratory of advanced catalysis, Gansu Province, State Key Laboratory of Applied Organic Chemistry, College of Chemistry and Chemical Engineering, Lanzhou University, Lanzhou, Gansu 730000, China. <sup>2</sup> State Key Laboratory of Catalysis, Dalian Institute of Chemical Physics, Chinese Academy of Sciences, Dalian National Laboratory for Clean Energy, Dalian, Liaoning 116023, China. <sup>5</sup> E-mail: lizl@lzu.edu.cn (Prof. Zelong Li); canli@dicp.ac.cn (Prof. Can Li).

## **Contents:**

### **General information**

#### **Extraction and transformation of birch lignin**

#### **The conversion of realistic organosolv birch lignin to amine monomers**

### **Catalyst Evaluation**

#### **Synthesis of $\beta$ -O-4 linkage model compounds.**

**Figure S1.** Representative examples of the transformation from lignin models to amines and amides.

**Figure S2.** Characterizations of 5 wt% Ru/C.

**Figure S3.** The optimization of reaction temperature.

**Figure S4.** The optimization of total pressure. The H<sub>2</sub>-NH<sub>3</sub> mixture always contains 0.8 MPa NH<sub>3</sub>.

**Scheme S1.** The control reaction for the conversion of CPE to amine.

**Figure S5.** Arrhenius plots for the transformation of the intermediates during the DPE transformation catalyzed by 5 wt% Ru/C at the temperature range of 463-478 K.

**Figure S6.** The recycle stability of Ru/C for the conversion of DPE to amines.

**Figure S7** 2D <sup>13</sup>C-<sup>1</sup>H HSQC spectra of organosolv birch lignin before reaction and the reaction mixture after the reaction and the 2D <sup>13</sup>C-<sup>1</sup>H HSQC spectra of cyclohexylamine.

**Figure S8.** 2D <sup>13</sup>C-<sup>1</sup>H HSQC spectra of organosolv birch lignin before reaction and the reaction mixture after the reaction.

**Figure S9.** 2D <sup>13</sup>C-<sup>1</sup>H HSQC spectra of organosolv birch lignin before reaction and the reaction mixture after reaction.

**Figure S10.** GC-MS analysis of organosolv lignin depolymerization mixture with Ru/C-H<sub>2</sub> system and Ru/C-H<sub>2</sub>-NH<sub>3</sub> system and organosolv lignin.

**Figure S11.** GC spectra of the depolymerization mixture of organosolv birch lignin with Ru/C-H<sub>2</sub> system.

**Figure S12.** Fragment information of ion at the retention time of 8.25 min of organosolv lignin depolymerization with Ru/C-H<sub>2</sub> system.

**Figure S13.** Fragment information of ion at the retention time of 13.93 min of organosolv lignin depolymerization with Ru/C-H<sub>2</sub> system.

**Figure S14.** Fragment information of ion at the retention time of 20.74 min of organosolv lignin depolymerization with Ru/C-H<sub>2</sub> system.

**Figure S15.** Fragment information of ion at the retention time of 27.08 min of organosolv lignin depolymerization with Ru/C-H<sub>2</sub> system.

**Figure S16.** Fragment information of ion at the retention time of 34.96 min of organosolv lignin depolymerization with Ru/C-H<sub>2</sub> system.

**Figure S17.** GC spectra of the depolymerization mixture of organosolv birch lignin with Ru/C-H<sub>2</sub>-NH<sub>3</sub> system.

**Figure S18.** Fragment information of ion at the retention time of 7.51 min of organosolv lignin depolymerization with Ru/C-H<sub>2</sub>-NH<sub>3</sub> system.

**Figure S19.** Fragment information of ion at the retention time of 10.32 min of organosolv lignin depolymerization with Ru/C-H<sub>2</sub>-NH<sub>3</sub> system.

**Figure S20.** Fragment information of ion at the retention time of 13.23 min of organosolv lignin depolymerization with Ru/C-H<sub>2</sub>-NH<sub>3</sub> system.

**Figure S21.** Fragment information of ion at the retention time of 16.23 min of organosolv lignin depolymerization with Ru/C-H<sub>2</sub>-NH<sub>3</sub> system.

**Figure S22.** Fragment information of ion at the retention time of 18.07 min of organosolv lignin depolymerization with Ru/C-H<sub>2</sub>-NH<sub>3</sub> system.

## **<sup>1</sup>H NMR of lignin models**

## **Reference**

## **General information**

All chemical reagents are obtained from commercial suppliers and used without further purification. 5% Ru/C (wetted with ca. 50% Water), 5% Pd/C (wetted with ca. 50% Water), 5% Pt/C (wetted with ca. 50% Water), and 5% Rh/C (wetted with ca. 50% Water) were purchased from Alfa Aesar. The quantitative analysis of product distribution was conducted by gas chromatography (GC), which was performed on an Agilent 8890 Gas chromatograph with a flame ionization detector equipped with OV-1701 capillary columns (30 m × 320 μm). The XRD results were collected on a Rigaku Ultima IV X-Ray diffractometer operating in Bragg-Brentano focusing geometry and using CuK $\alpha$  radiation from a generator operating at 40 kV and 40 mA. The transmission electron microscopy (TEM) images, high-resolution (HR) TEM images, and STEM-EDX mapping images were collected on an FEI Talos F200S. <sup>1</sup>H NMR spectra were taken on Varian Inova 600 with TMS as an internal standard and CDCl<sub>3</sub> as solvent. HSQC NMR spectra were measured on a Bruker Avance NEO 600 MHz spectrometer with CD<sub>3</sub>OD as solvent.

## **Extraction of birch lignin**

The birch sawdust (40-80 mesh, 30 g) was added into an autoclave reactor and charged with MeOH (200 mL), and the mixture was heated at 180°C under Ar atmosphere for 3 h. The mixture was cooled and filtrated. The filtrate was concentrated in vacuo, and the residue was precipitated by THF/n-hexane (150 mL). The fine lignin was obtained through drying in vacuo at 40°C as a brown solid (2.7 g).

## **The conversion of realistic organosolv birch lignin to amine monomers**

Organosolv birch lignin (100 mg), 5% Ru/C (25 mg), and THF (5 mL) were added to an autoclave reactor. The autoclave reactor was flushed with H<sub>2</sub> 5 times, and 0.8 MPa

and 4.2 MPa H<sub>2</sub> were charged into the autoclave reactor. The reaction was conducted at 220°C for 72 hours. Then the reactor was cooled to room temperature. The mixture was filtered using a filter membrane and the solution was analyzed by GC-MS. The solvent was removed in vacuo. Residues were dissolved in CD<sub>3</sub>OD and filtered using a filter membrane. The filtrate was analyzed by 2D <sup>13</sup>C-<sup>1</sup>H HSQC NMR.

## Catalyst Evaluation

The catalytic reaction was carried out in an autoclave reactor, and 2.5 mmol lignin model compounds, catalyst, and 5 mL n-hexane were charged into the reactor. After the reactor was flushed with H<sub>2</sub> 5 times, the autoclave reactor was charged with 0.8 MPa ammonia and 2.2 MPa H<sub>2</sub>, and the reaction was conducted at 200°C for 2 hours with a stirring speed of 600 rpm. After the reaction, the reactor was cooled to room temperature with ice water, and the reaction solution was diluted with CH<sub>2</sub>Cl<sub>2</sub> and analyzed by gas chromatography (GC) analysis on an Agilent 8890 Gas chromatograph with flame ionization detector equipped with OV-1701 capillary columns (30 m × 320 μm). n-Hexadecane was used as an internal standard to calibrate the organic product concentrations and carbon balances. The carbon balances for all of the reported experiments were better than 90%.

For the kinetic data, the results were collected at time durations.

Calculation of conversion, yield, and selectivity:

$$Conv.(%) = \frac{(n_{lignin\ model})_0 - (n_{lignin\ model})_{end}}{(n_{lignin\ model})_0} * 100\%$$

$$Sel.(xi)(%) = \frac{n_{xi}}{n_{x1} + n_{x2} + n_{x3} + \dots + n_{xn}} * 100\%$$

$$Yield(xi)(%) = \frac{n_{xi}}{(n_{lignin\ model})_0} * 100\%$$

## Synthesis of $\beta$ -O-4 linkage model compounds.

All substrates have been prepared according to literature procedures with minor modifications.<sup>1</sup>

### Synthesis of 2-phenoxy-1-phenylethan-1-one

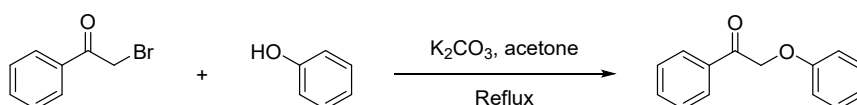

A 1 L three-necked round-bottomed flask equipped with a reflux condenser and a dropping funnel was charged with phenol (5.2 g, 55 mmol) and K<sub>2</sub>CO<sub>3</sub> (10.4 g, 76 mmol) in acetone (250 mL) and stirred at RT. To this suspension, 2-bromoacetophenone (10.0 g, 50 mmol) in acetone (50 mL) was added dropwise over 45 min at RT. The resulting suspension was stirred at reflux for 4 h, then the suspension was filtered out and the filtrate was concentrated in vacuo. The crude product was purified by recrystallization from petroleum ether to give 2-phenoxy-1-phenylethanone as a white solid (7.47 g, 4.9 mmol) in 71% yield. <sup>1</sup>H NMR (600 MHz, CDCl<sub>3</sub>)  $\delta$  8.01-7.98 (m, 2H), 7.62-7.58 (m, 1H), 7.50-7.47 (m, 2H), 7.29-7.26 (m, 2H), 6.99-6.96 (m, 1H), 6.96-6.93 (m, 2H), 5.26 (s, 2H).

### Synthesis of 2-phenoxy-1-phenylethan-1-ol

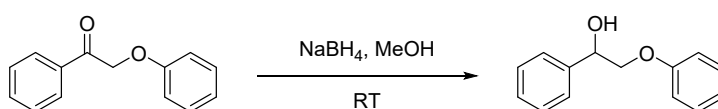

A 500 mL round bottom flask was charged with 2-phenoxy-1-phenylethanone (4.25 g, 20.0 mmol) and methanol (100 mL). Sodium borohydride (0.83 g, 22.0 mmol) was added to the solution in small portions at 0°C, the suspension was stirred at 0°C until the reaction is finished. After the reaction is completed, 100 mL of saturated aqueous NH<sub>4</sub>Cl was charged into the reaction flask, followed by the addition of ethyl acetate (250 mL). After separation, the organic phase was washed with H<sub>2</sub>O (100 mL X 2) and saturated with aqueous NaCl (100 mL), and dried over anhydrous Na<sub>2</sub>SO<sub>4</sub>, filtered and the organic phase was evaporated in vacuum. The crude product was purified by recrystallization from hexane to give 3.91 g white crystalline in 90% yield. <sup>1</sup>H

NMR (600 MHz, CD<sub>3</sub>OD)  $\delta$  7.46-7.44 (m, 2H), 7.37-7.34 (m, 2H), 7.30-7.27 (m, 1H), 7.25-7.22 (m, 2H), 6.91-6.89 (m, 3H), 5.02 (t, J = 6.0 Hz, 1H), 4.04 (d, J = 6.0 Hz, 2H).

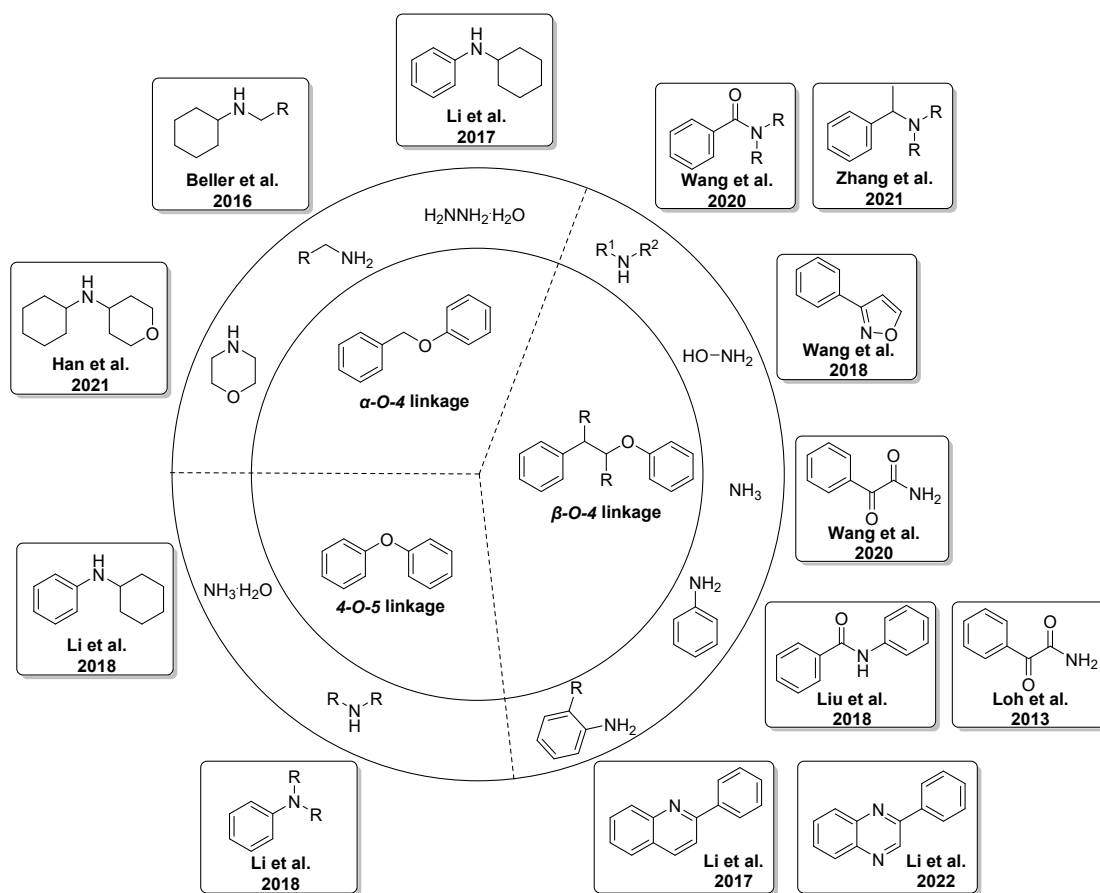

**Figure S1.** Representative examples of the transformation from lignin models to amines and amides.

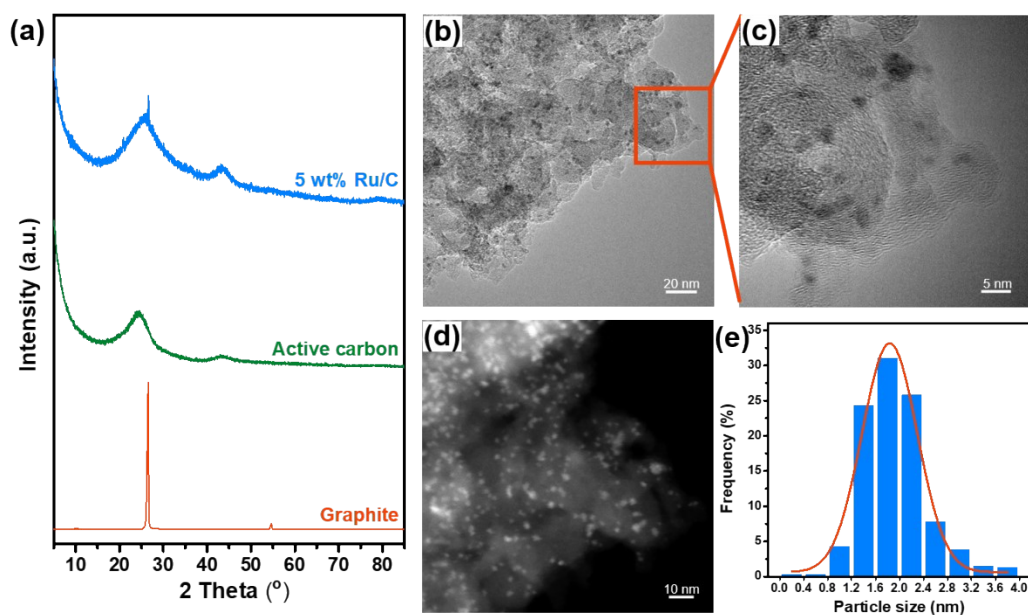

**Figure S2.** Characterizations of 5 wt% Ru/C. (a) X-Ray Diffraction image; (b and c) High-resolution transmission electron microscopy images of 5 wt% Ru/C; (d) High-angle annular dark-field scanning transmission electron microscopy image of 5 wt% Ru/C; (e) Ru particle diameter distribution of Ru/C.



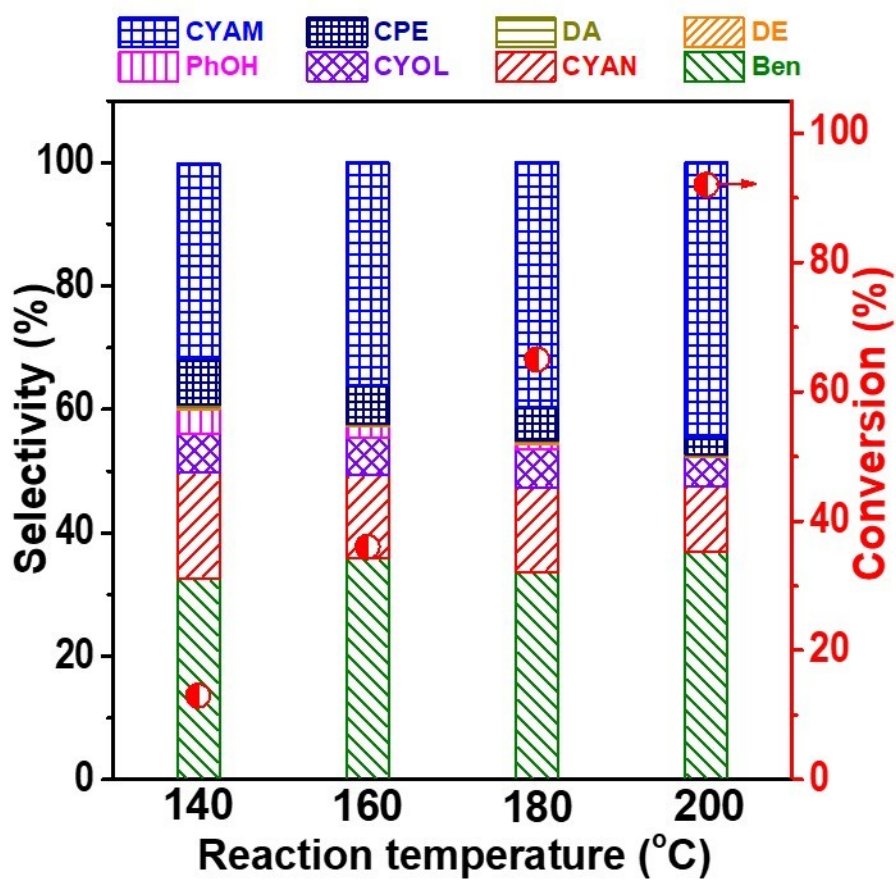

Figure S3. The optimization of reaction temperature.

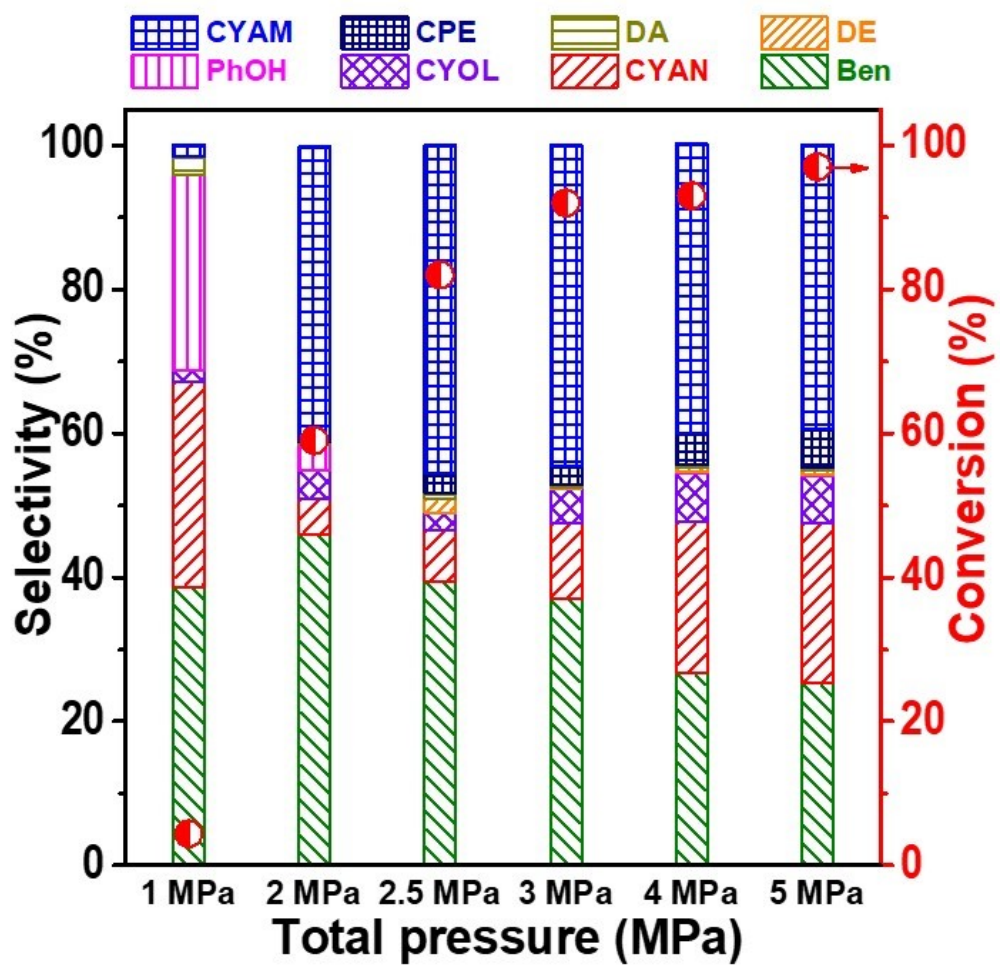

**Figure S4.** The optimization of total pressure. The  $\text{H}_2\text{-NH}_3$  mixture always contains 0.8 MPa  $\text{NH}_3$ .

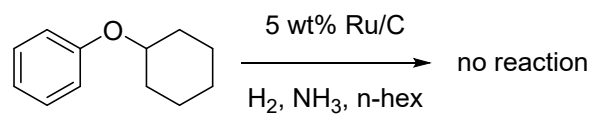

**Scheme S1.** The control reaction for the conversion of CPE to amine.

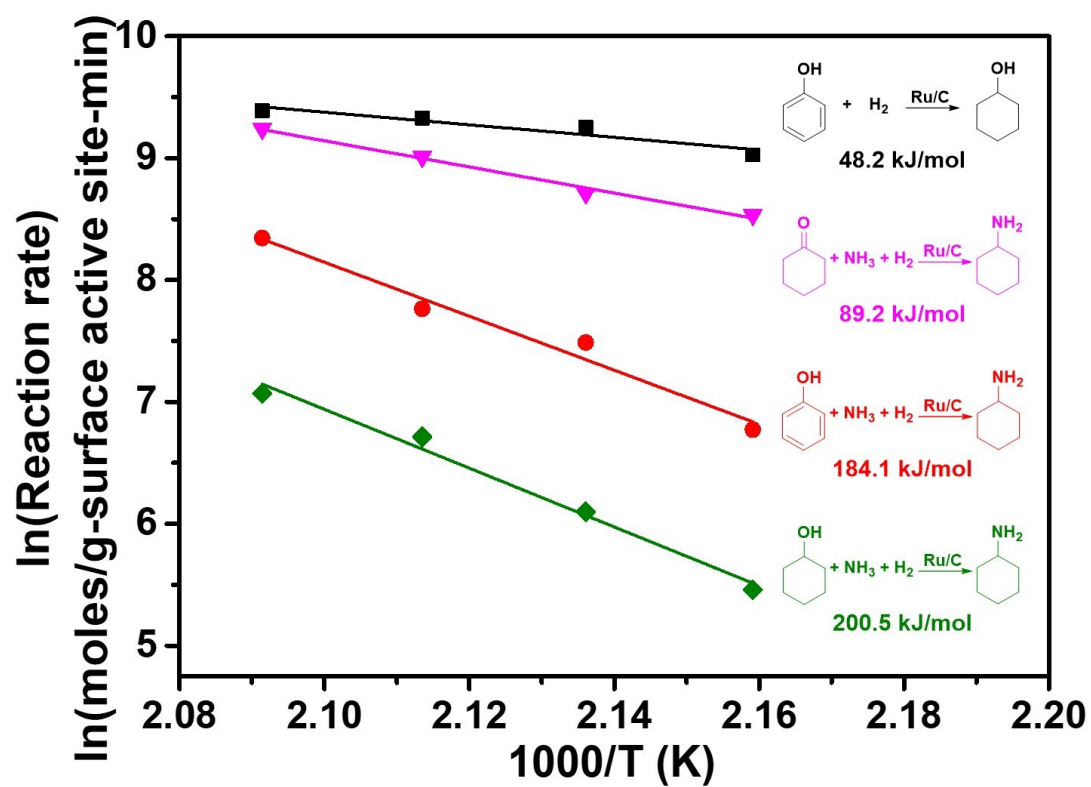

**Figure S5.** Arrhenius plots for the transformation of the oxygen-contained intermediates during the DPE transformation catalyzed by 5 wt% Ru/C at the temperature range of 463-478 K.

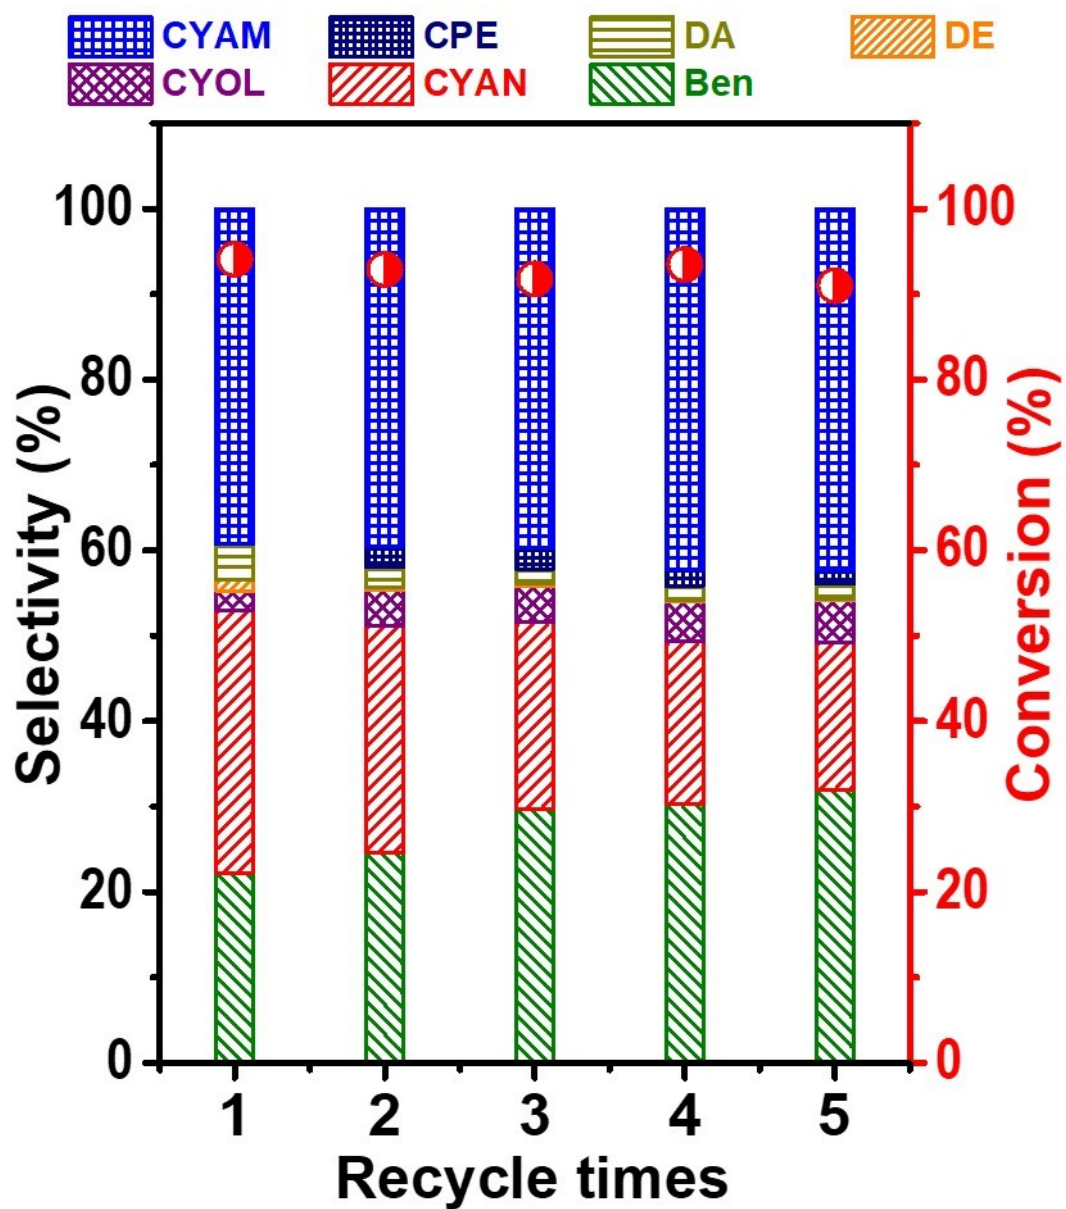

Figure S6. The recycle stability of Ru/C for the conversion of DPE to amines.

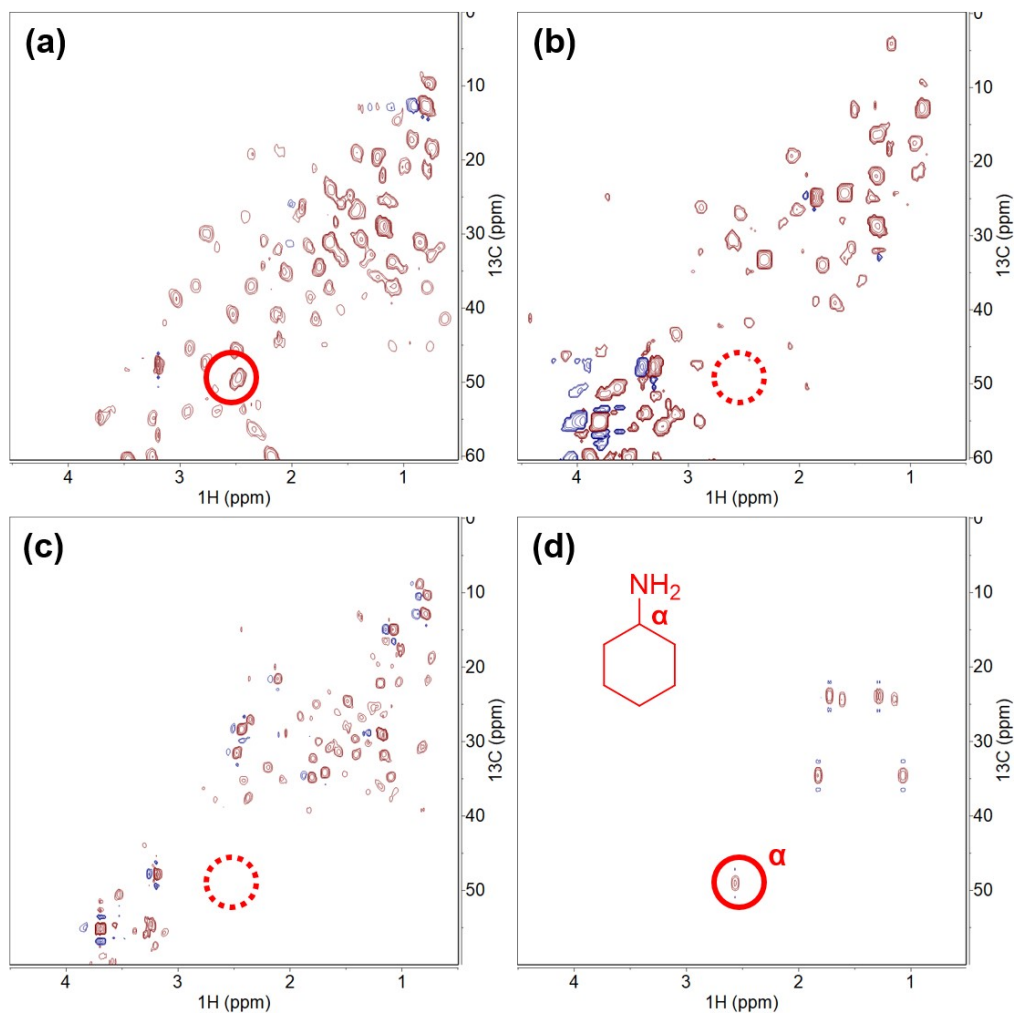

**Figure S7** 2D  $^{13}\text{C}$ - $^1\text{H}$  HSQC spectra of (a) organosolv birch lignin after depolymerization with Ru/C- $\text{H}_2$ - $\text{NH}_3$  for 72 h, (b) organosolv birch lignin before reaction, (c) organosolv birch lignin after depolymerization with Ru/C- $\text{H}_2$  for 72 h, and (d) cyclohexylamine. All spectra were obtained in  $\text{CD}_3\text{OD}$ .

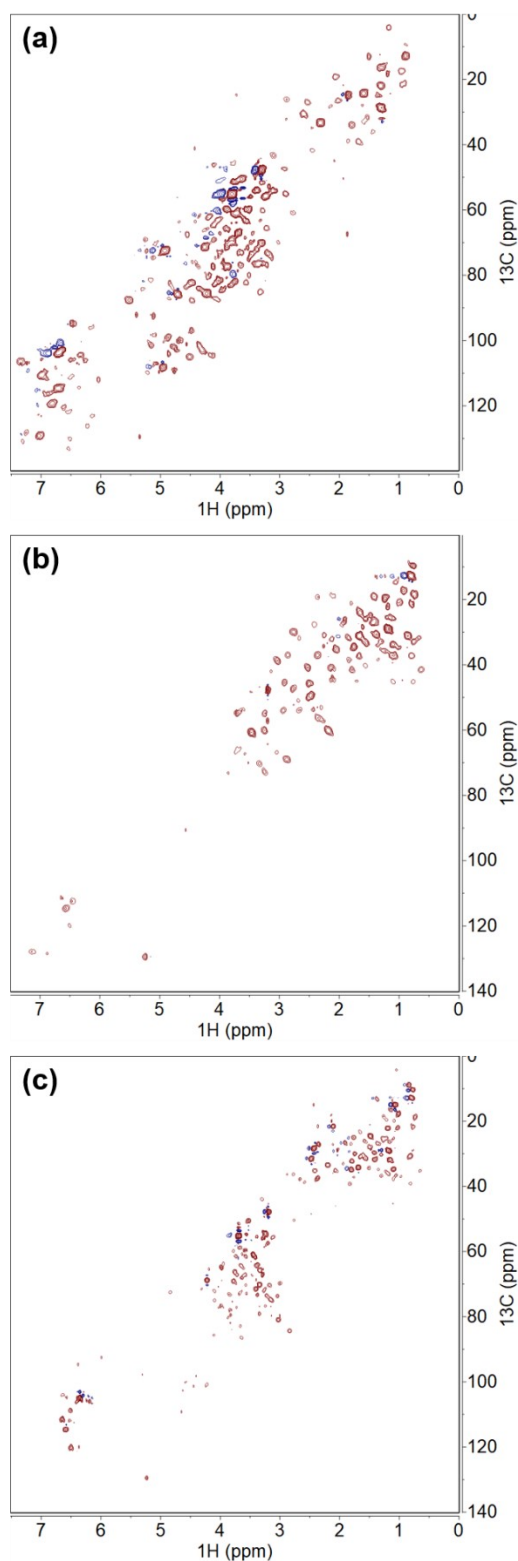

**Figure S8** 2D  $^{13}\text{C}$ - $^1\text{H}$  HSQC spectra of (a) organosolv birch lignin before reaction, (b) organosolv birch lignin after depolymerization with  $\text{Ru}/\text{C}-\text{H}_2-\text{NH}_3$  for 72 h, and (c) organosolv birch lignin after depolymerization with  $\text{Ru}/\text{C}-\text{H}_2$  for 72 h. All spectra were obtained in  $\text{CD}_3\text{OD}$ .

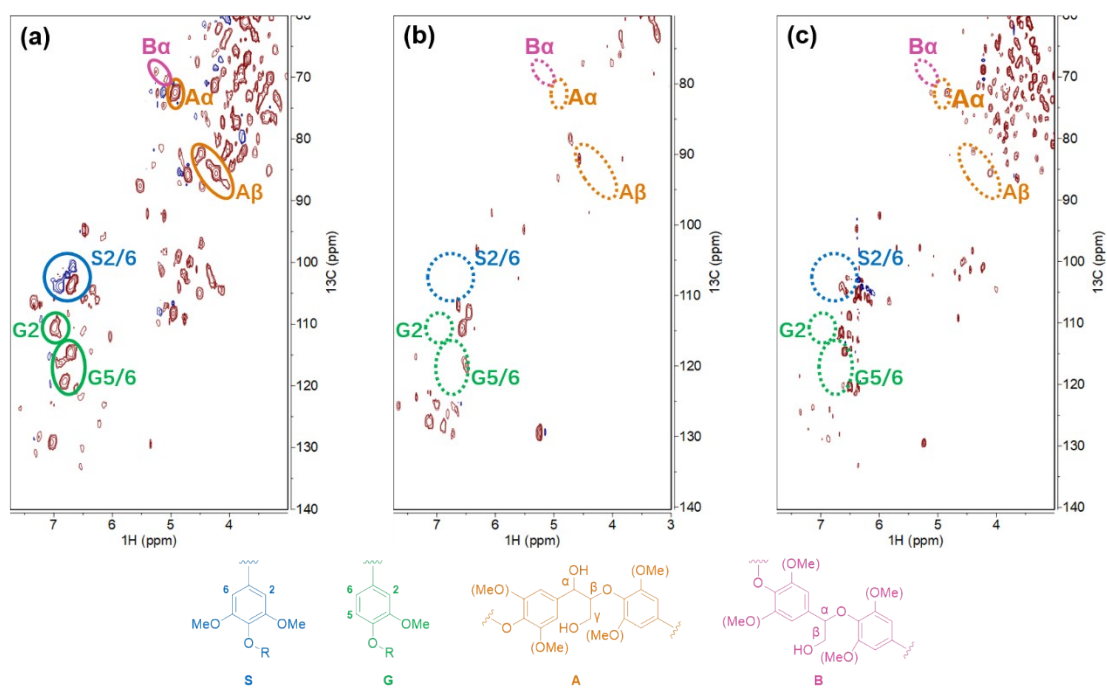

**Figure S9** 2D  $^{13}\text{C}$ - $^1\text{H}$  HSQC spectra of (a) organosolv birch lignin before reaction, (b) organosolv birch lignin after depolymerization with Ru/C- $\text{H}_2$ - $\text{NH}_3$  for 72 h, and (c) organosolv birch lignin after depolymerization with Ru/C- $\text{H}_2$  for 72 h. All spectra were obtained in  $\text{CD}_3\text{OD}$ .



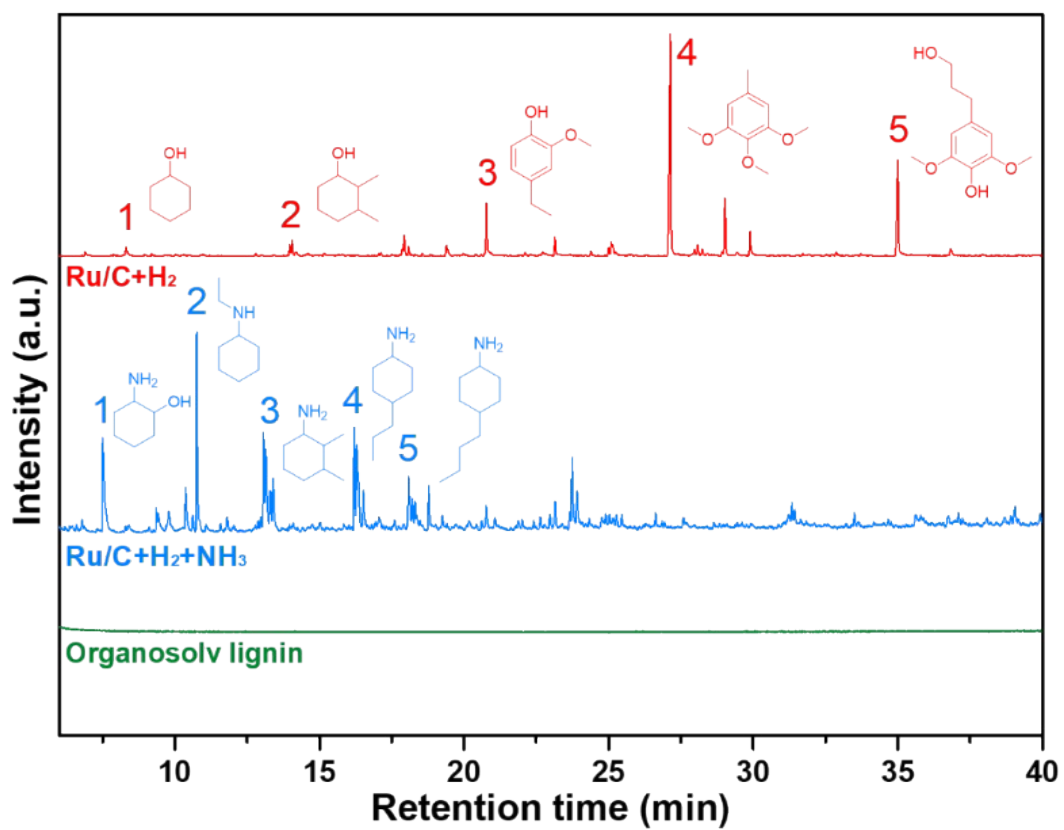

**Figure S10.** GC-MS analysis of organosolv lignin depolymerization mixture with Ru/C-H<sub>2</sub> system and Ru/C-H<sub>2</sub>-NH<sub>3</sub> system and organosolv lignin.

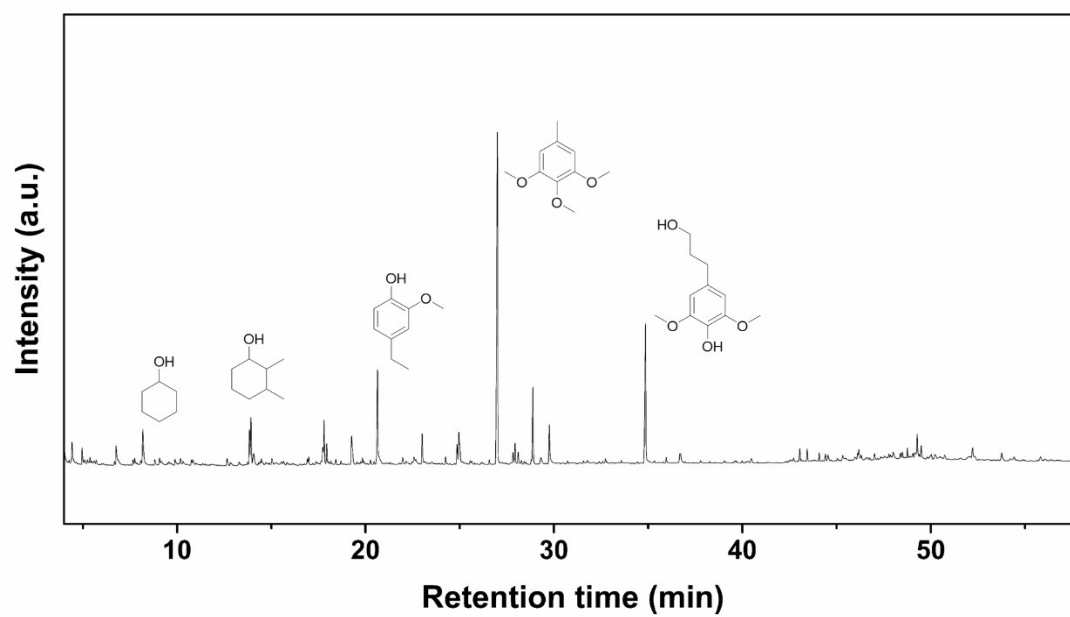

**Figure S11.** GC spectra of the depolymerization mixture of organosolv birch lignin with Ru/C-H<sub>2</sub> system.

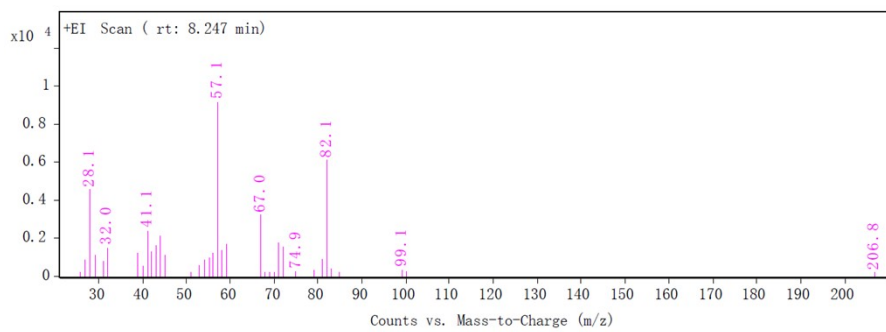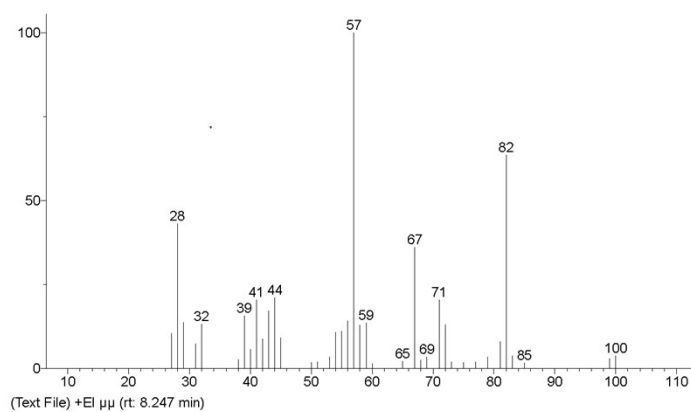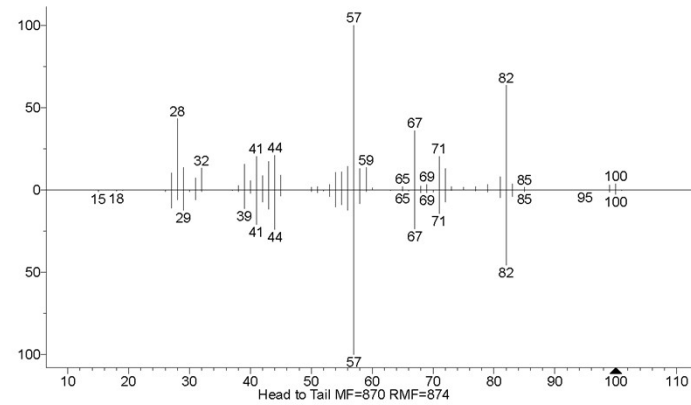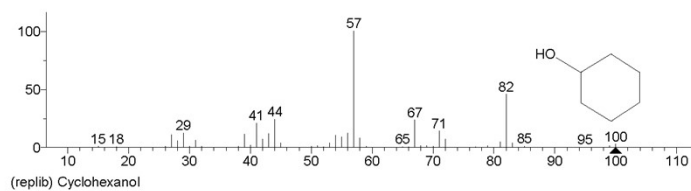

**Figure S12.** Fragment information of ion at the retention time of 8.25 min of organosolv lignin depolymerization with Ru/C-H<sub>2</sub> system.

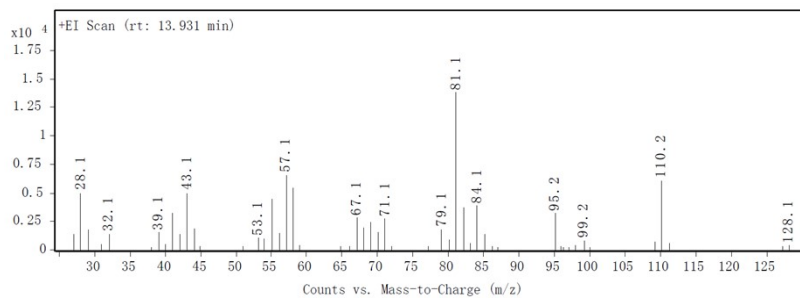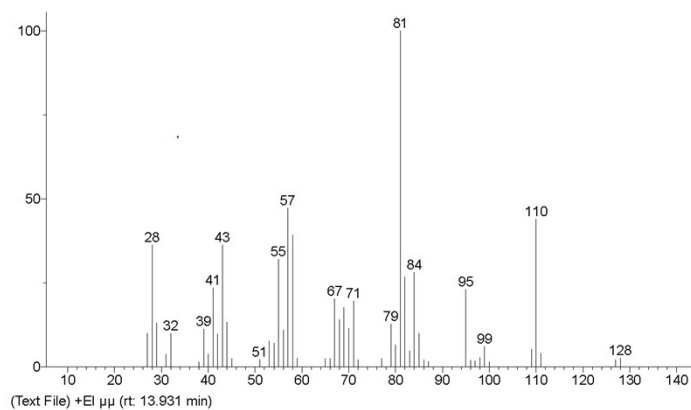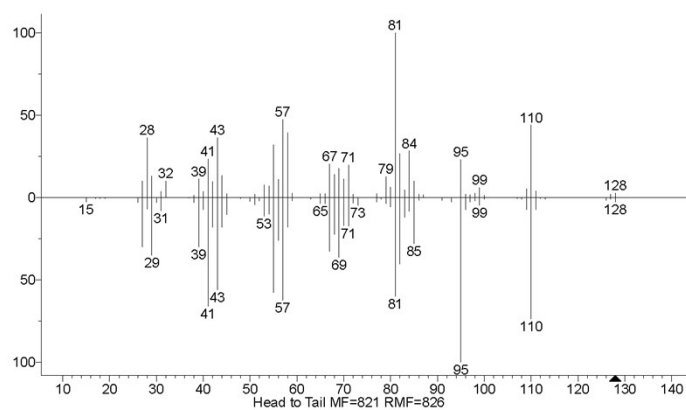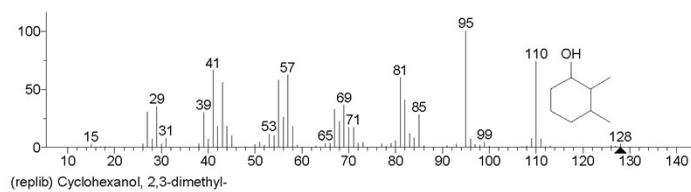

**Figure S13.** Fragment information of ion at the retention time of 13.93 min of organosolv lignin depolymerization with Ru/C-H<sub>2</sub> system.

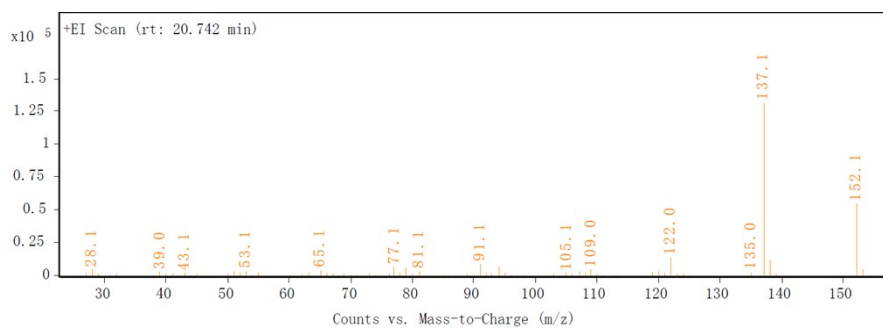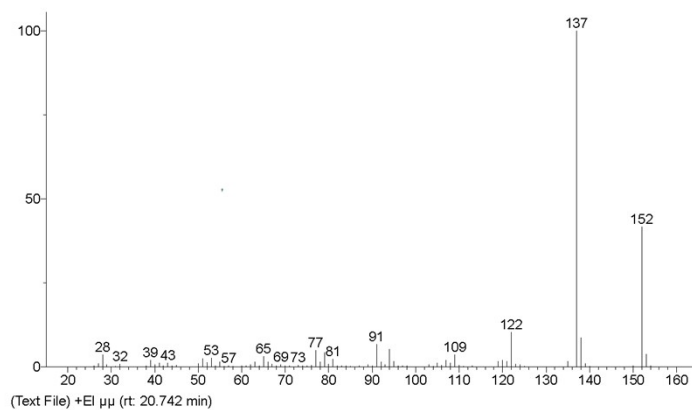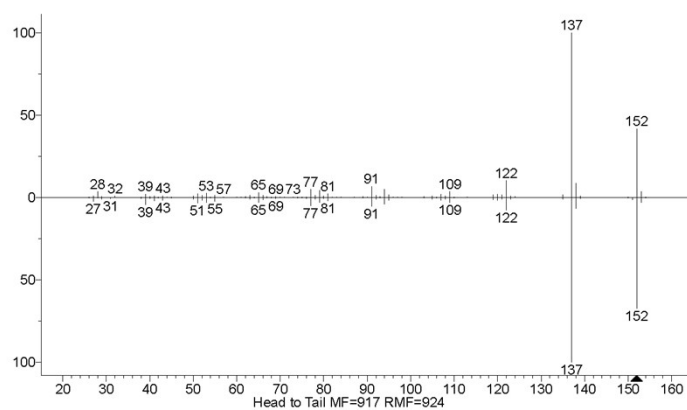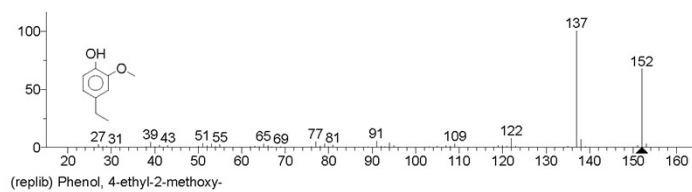

**Figure S14.** Fragment information of ion at the retention time of 20.74 min of organosolv lignin depolymerization with Ru/C-H<sub>2</sub> system.

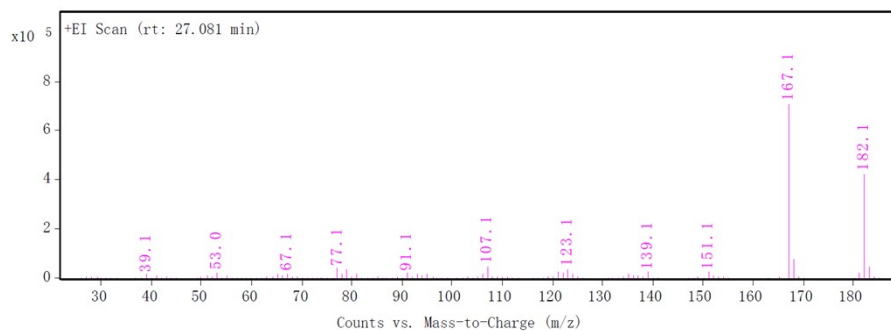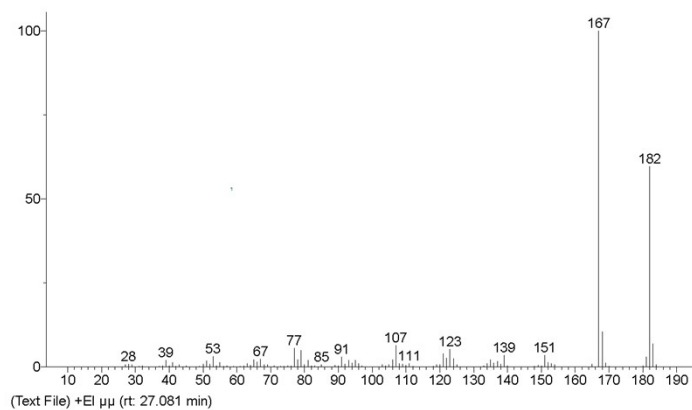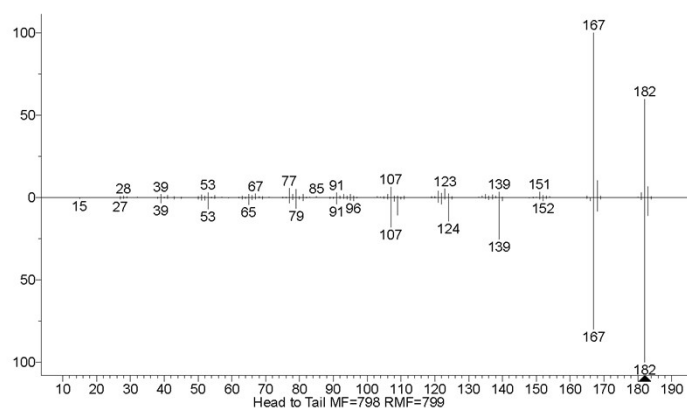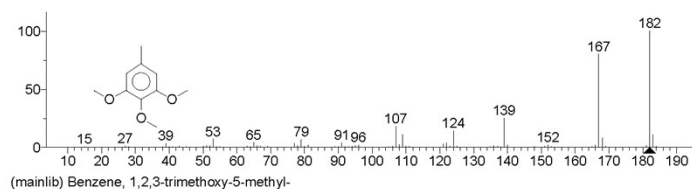

**Figure S15.** Fragment information of ion at the retention time of 27.08 min of organosolv lignin depolymerization with Ru/C-H<sub>2</sub> system.

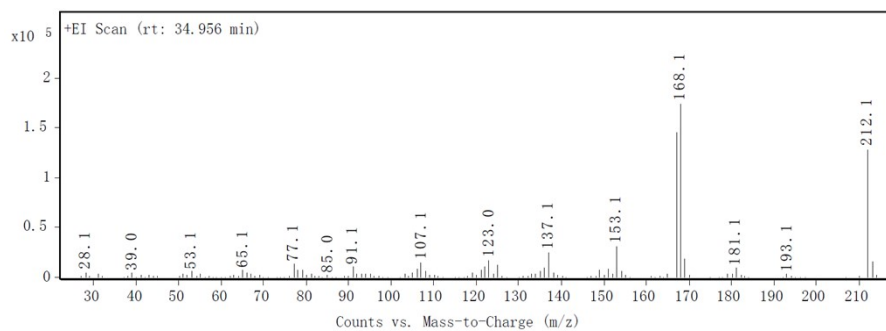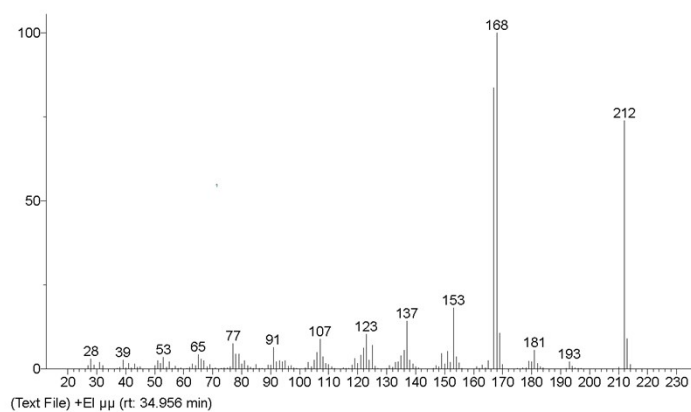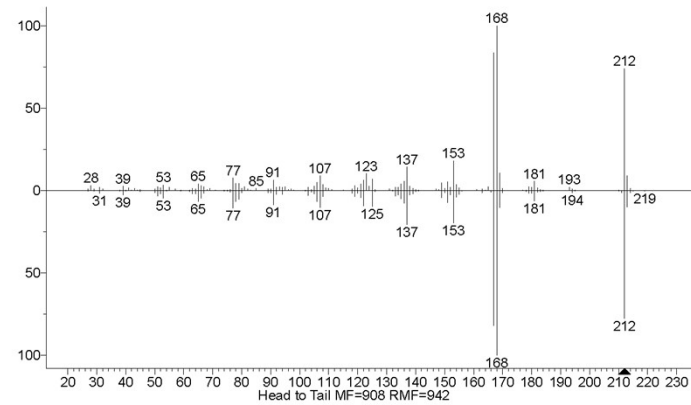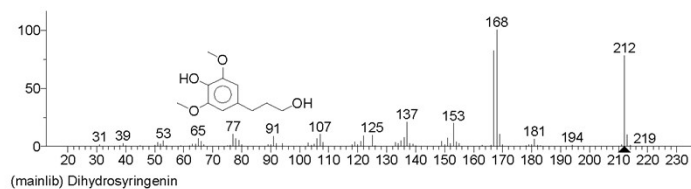

**Figure S16.** Fragment information of ion at the retention time of 34.96 min of organosolv lignin depolymerization with Ru/C-H<sub>2</sub> system.

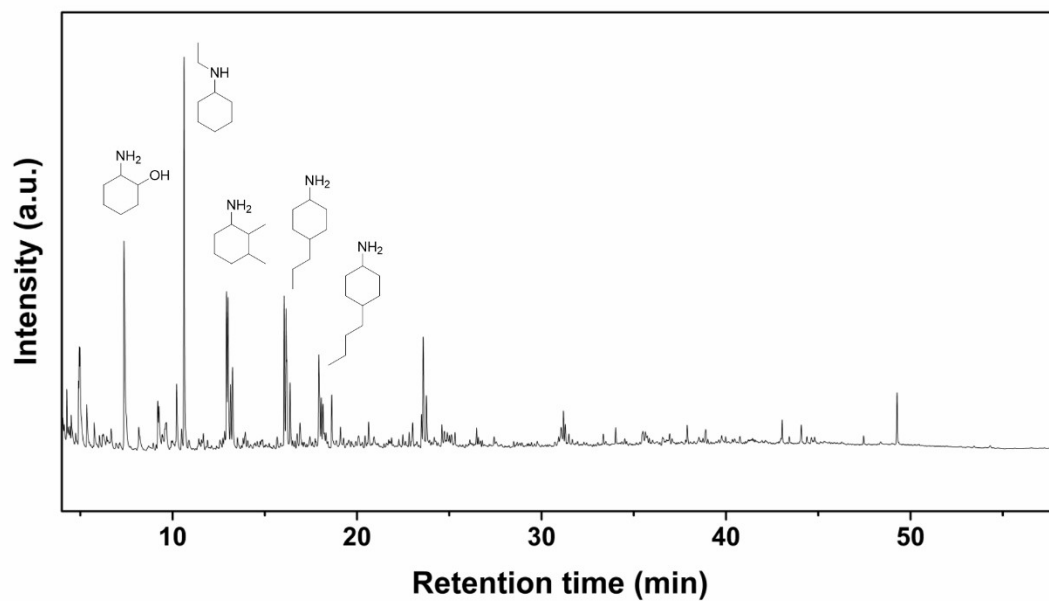

**Figure S17.** GC spectra of the depolymerization mixture of organosolv birch lignin with Ru/C-H<sub>2</sub>-NH<sub>3</sub> system.



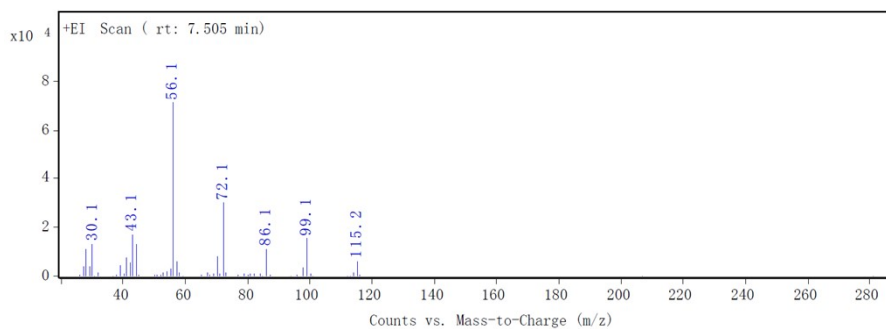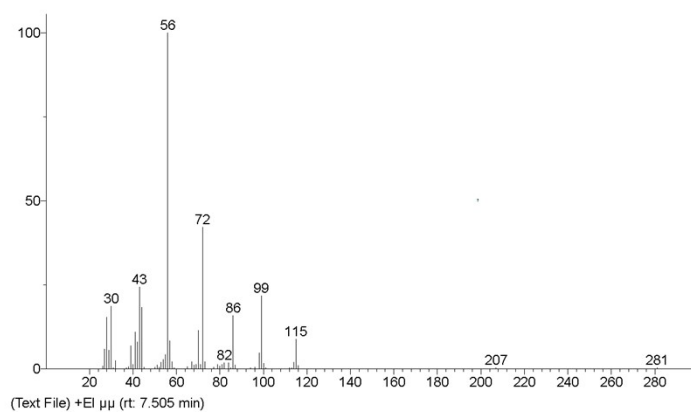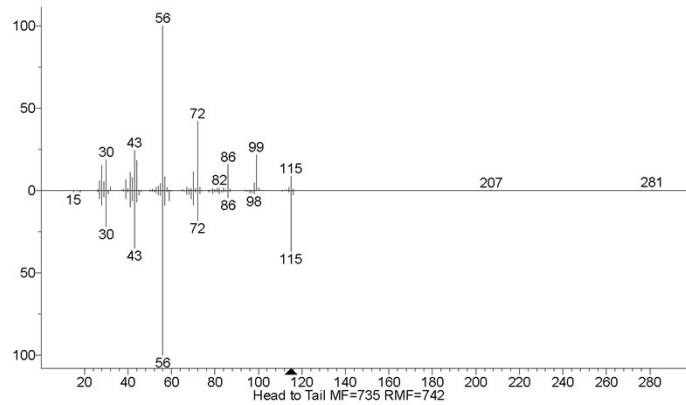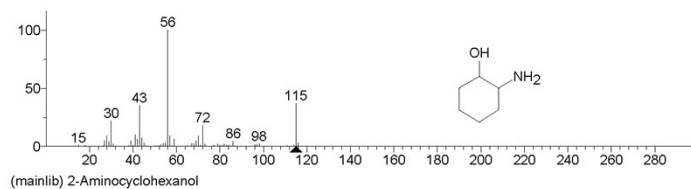

**Figure S18.** Fragment information of ion at the retention time of 7.51 min of organosolv lignin depolymerization with Ru/C-H<sub>2</sub>-NH<sub>3</sub> system.

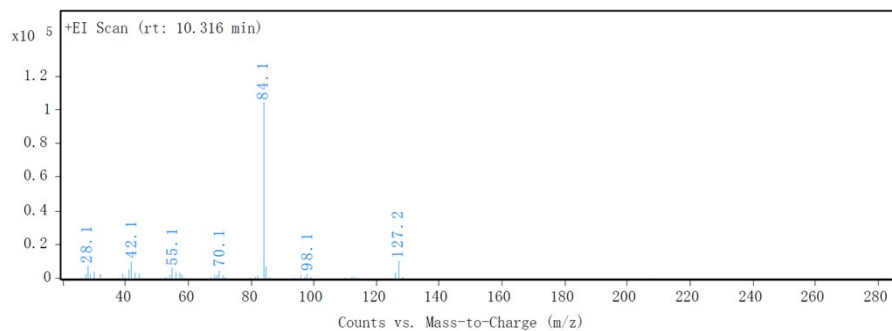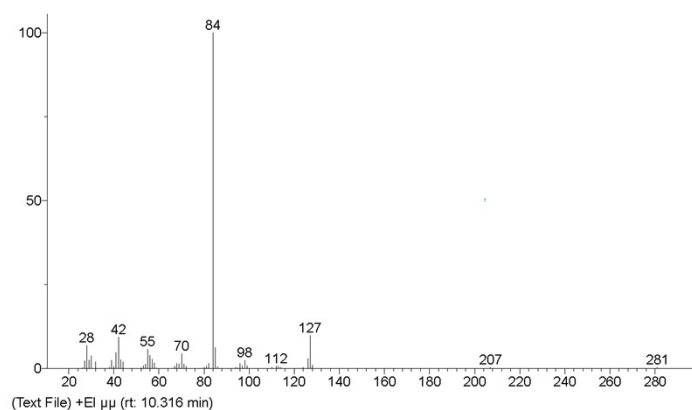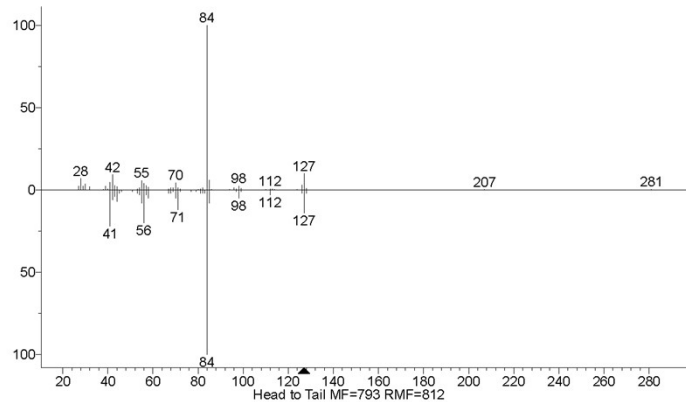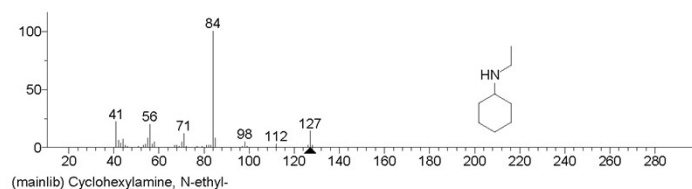

**Figure S19.** Fragment information of ion at the retention time of 10.32 min of organosolv lignin depolymerization with Ru/C-H<sub>2</sub>-NH<sub>3</sub> system.

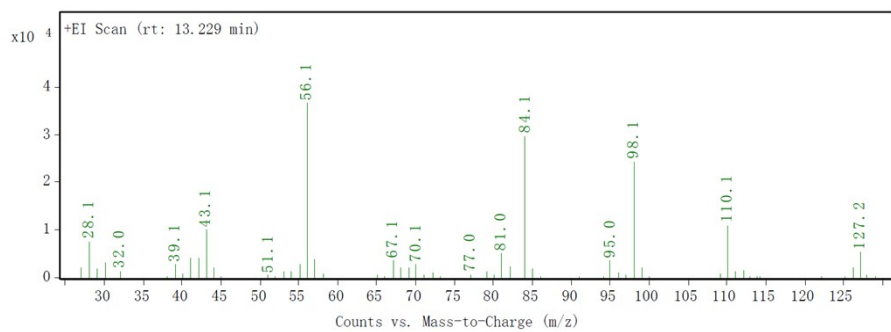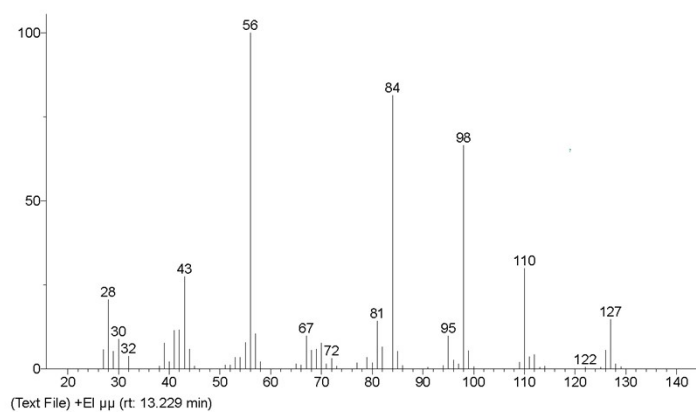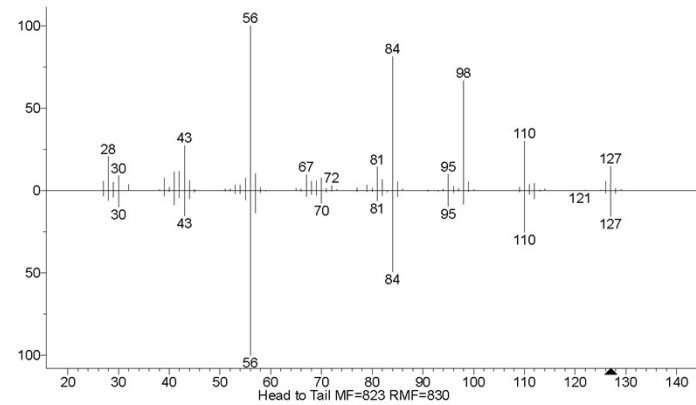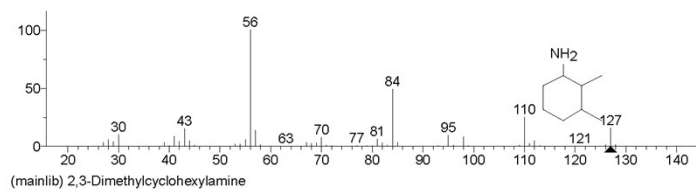

**Figure S20.** Fragment information of ion at the retention time of 13.23 min of organosolv lignin depolymerization with Ru/C-H<sub>2</sub>-NH<sub>3</sub> system.

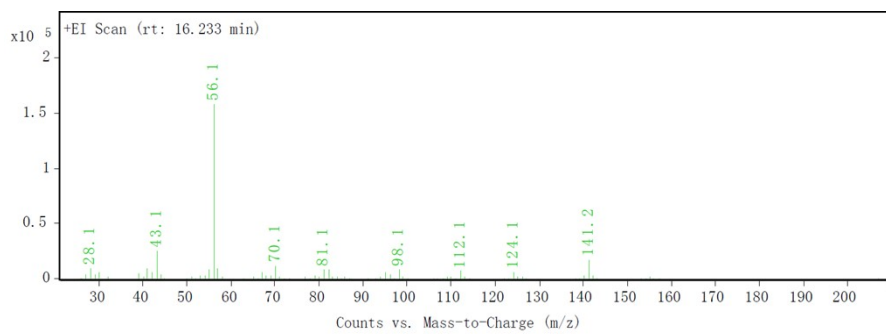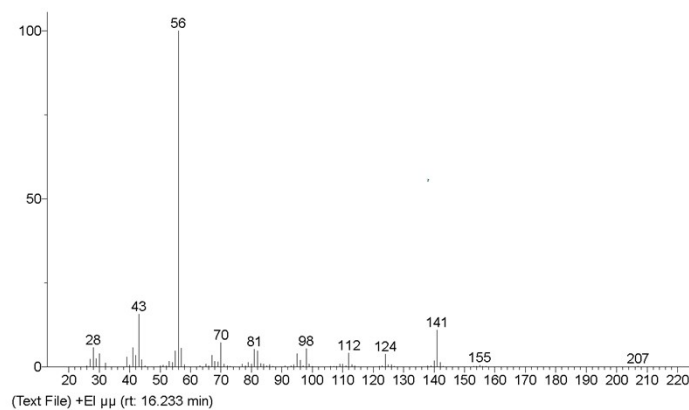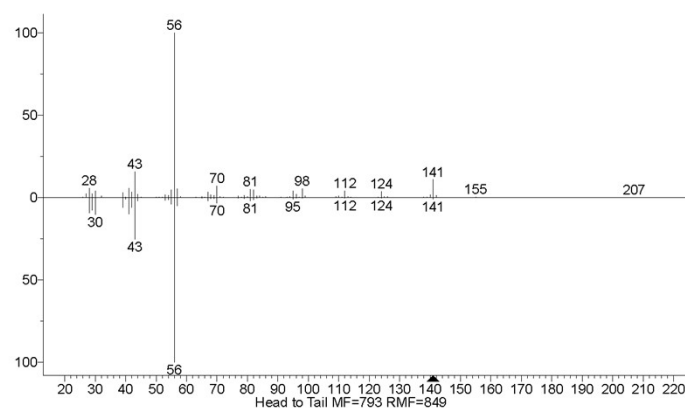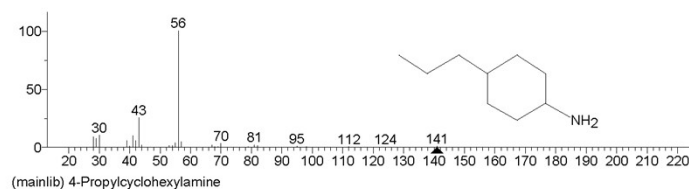

**Figure S21.** Fragment information of ion at the retention time of 16.23 min of organosolv lignin depolymerization with Ru/C-H<sub>2</sub>-NH<sub>3</sub> system.

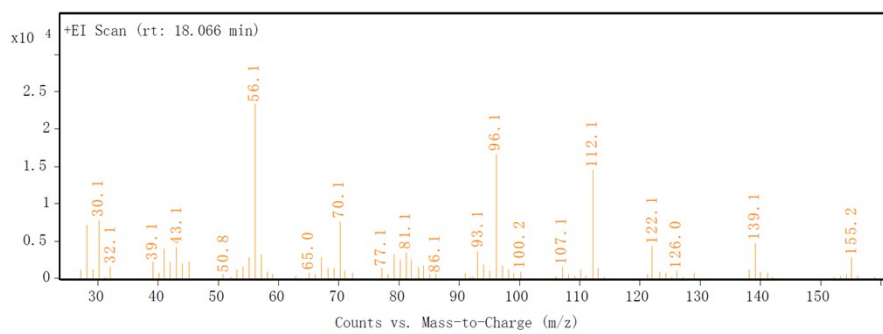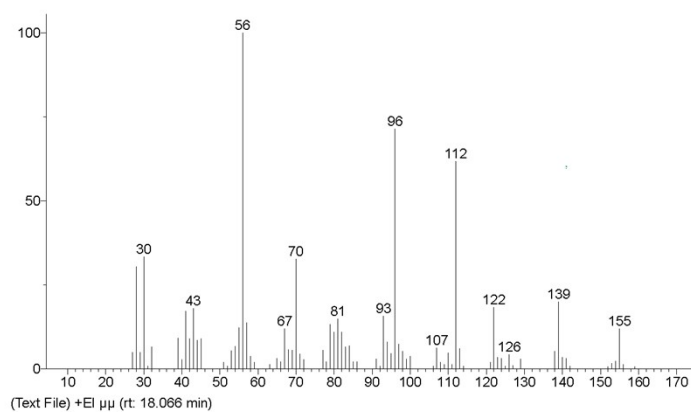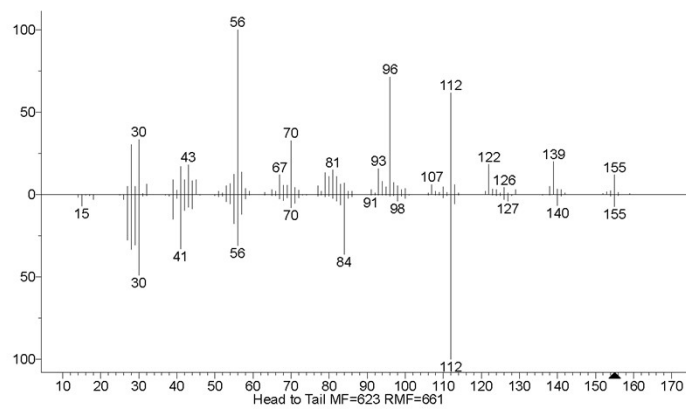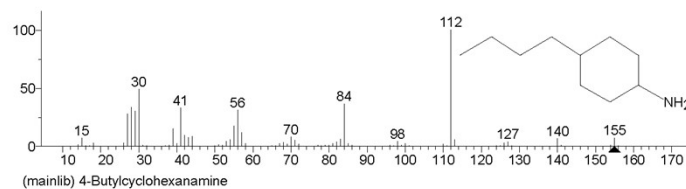

**Figure S22.** Fragment information of ion at the retention time of 18.07 min of organosolv lignin depolymerization with Ru/C-H<sub>2</sub>-NH<sub>3</sub> system.

## 6. <sup>1</sup>H NMR of lignin models

### 2-phenoxy-1-phenylethan-1-one

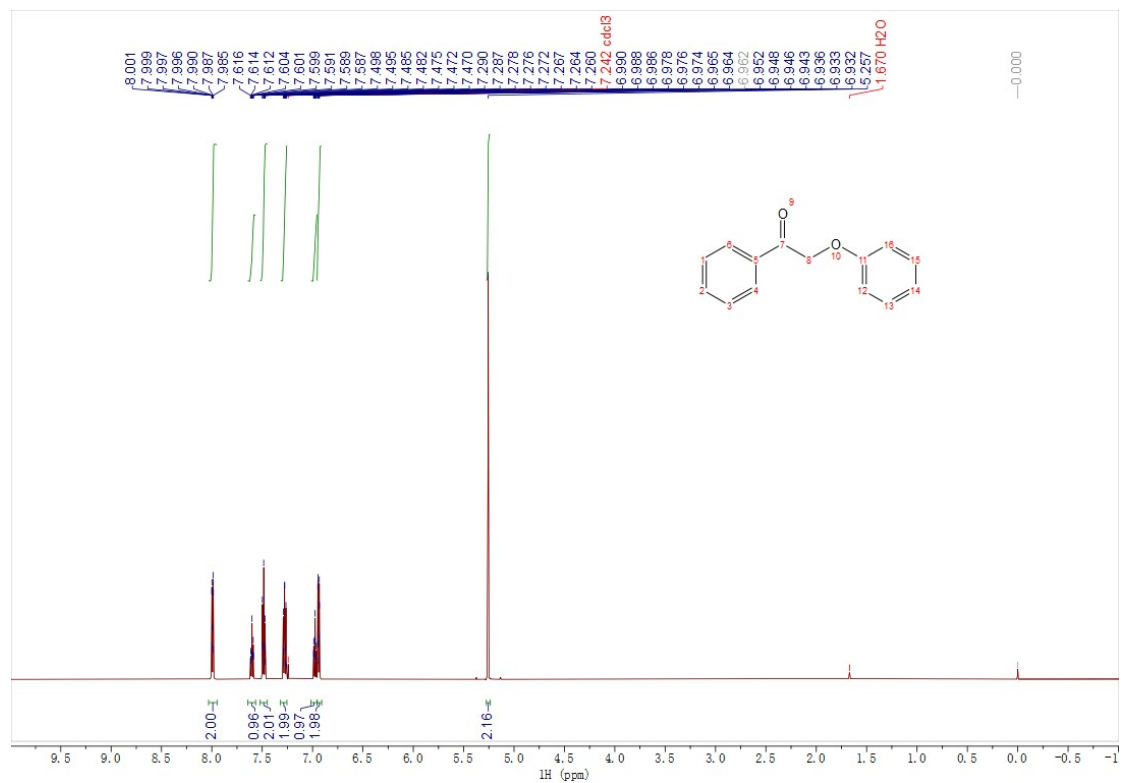

# 2-phenoxy-1-phenylethan-1-ol

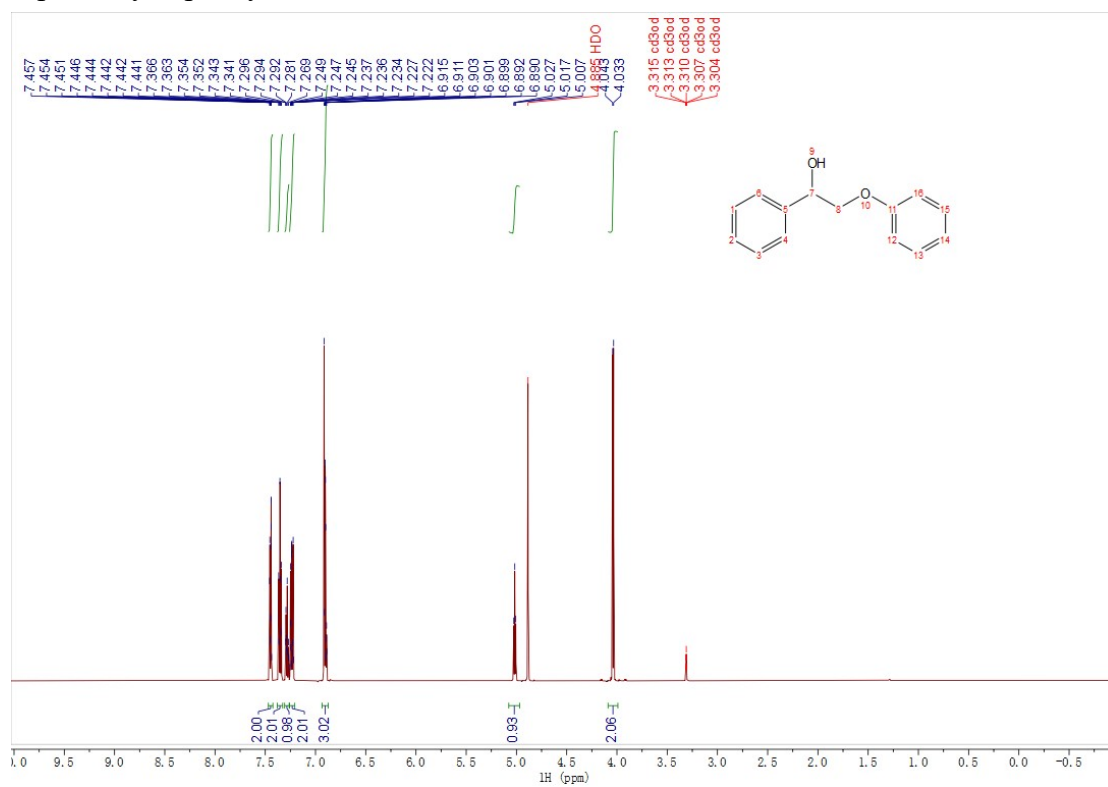

## Reference

1. J.-w. Zhang, G.-p. Lu, C. Cai, *Green Chemistry* **2017**, *19*, 4538-4543.
